# Supplementary material
Source: PubMed Central journal article supplement (PMC3318642)
Supplement: supp_86.8.4496_FigS1.pdf [file supp_86.8.4496_FigS1.pdf]

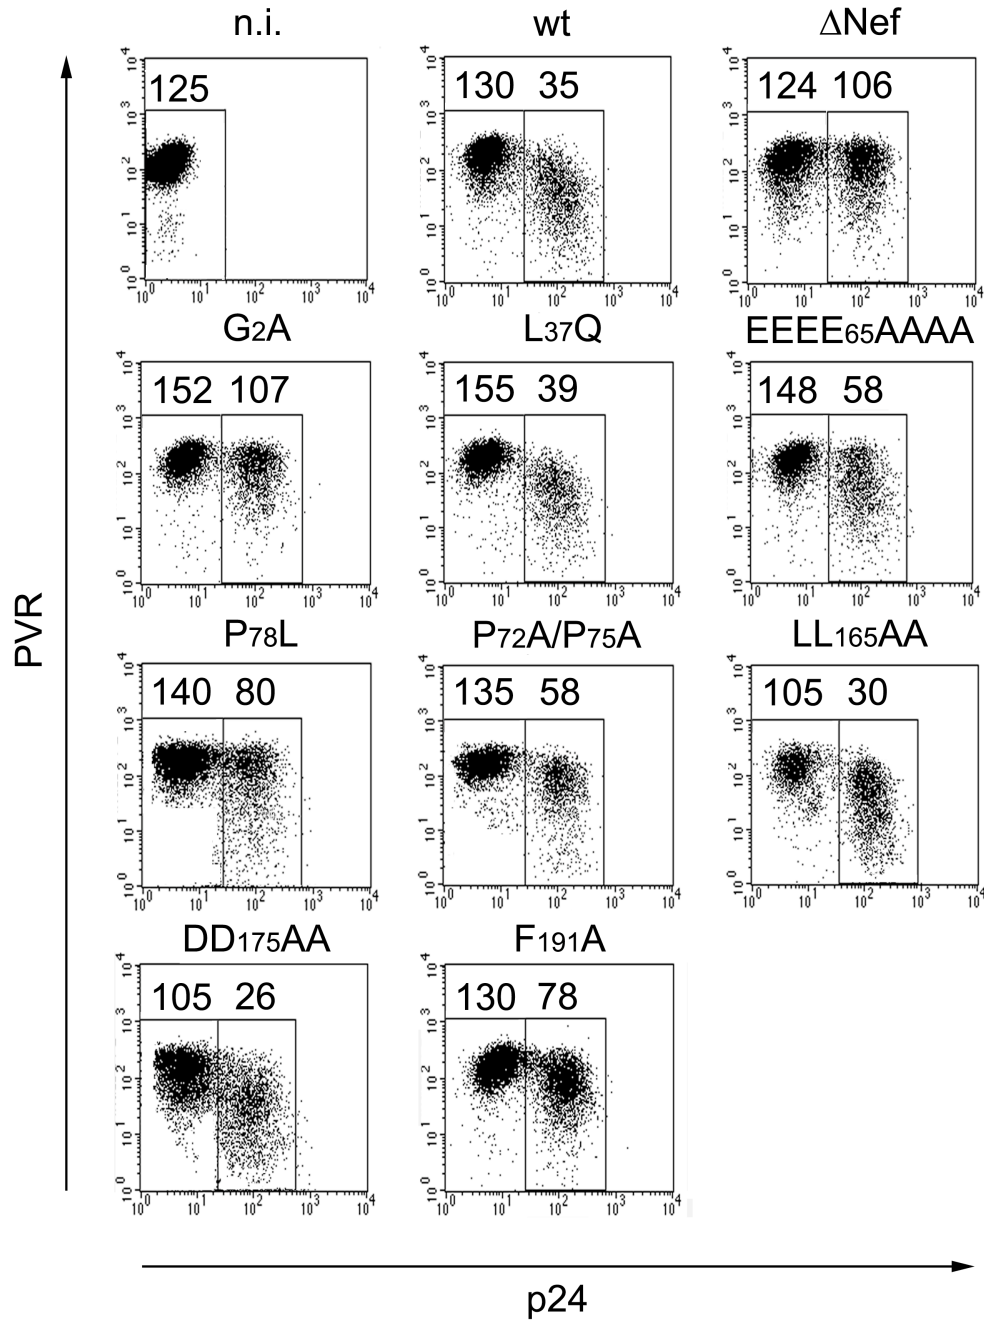

FIG. S1. PVR surface modulation upon infection of Jurkat cells by a panel of HIV-1 viruses expressing Nef proteins mutated at conserved residues. Jurkat cells n.i. or infected with the indicated viruses (see Table 1) were analysed for the expression of surface PVR and intracellular p24. MFI values for PVR of p24<sup>-</sup> (left gate) and p24<sup>+</sup> cells (right gate) are indicated. Data representative of one out of six independent experiments are shown.
